# Supplementary material for: Improved electrocaloric effect and working temperature span in BaTiO3-based ferroelectric ceramics via texture engineering
Source: Royal Society of Chemistry journal article supplement (doi:10.1039/d5tc00991j), 2025-01-01
Supplement: d5tc00991j1.pdf [file d5tc00991j1.pdf]

## Supplementary Information

### Improved Electrocaloric Effect and Working Temperature Span in BaTiO<sub>3</sub>-based Ferroelectric Ceramics via Texture Engineering

Meng Liu<sup>a</sup>, Xiafeng He<sup>a</sup>, Li Ma<sup>a</sup>, Zhenyong Cen<sup>a</sup>, Xuefeng Chen<sup>c</sup>, Nengneng Luo<sup>a,\*</sup>

<sup>a</sup> State Key Laboratory of Featured Metal Materials and Life-cycle Safety for Composite Structures, School of Resources, Environment and Materials, Guangxi University, Nanning 530004, China

<sup>b</sup> The Key Lab of Inorganic Functional Materials and Devices, Shanghai Institute of Ceramics, Chinese Academy of Sciences, 200050, Shanghai, China

---

\* Author to whom correspondence should be addressed.

Electronic mail: luonn1234@163.com.

**Table S1** The lattice parameters for random, <001>, <111> textured ceramics

| ceramics | Phase type        | a      | b      | c      | $\alpha$ | $R_{wp}$ | $R_p$ | $\chi^2$ |
|----------|-------------------|--------|--------|--------|----------|----------|-------|----------|
| random   | $R3m$<br>(74.3%)  | 4.0248 | 4.0248 | 4.0248 | 89.925   | 9.39%    | 6.81% | 1.185    |
|          | $P4mm$<br>(25.7%) | 4.0182 | 4.0182 | 4.0254 | 90       |          |       |          |
| <001>    | $R3m$<br>(63.6%)  | 4.0256 | 4.0256 | 4.0256 | 89.899   | 8.99%    | 6.42% | 1.058    |
|          | $P4mm$<br>(36.4%) | 4.0179 | 4.0179 | 4.0334 | 90       |          |       |          |
| <111>    | $R3m$<br>(86.3%)  | 4.0253 | 4.0253 | 4.0253 | 89.907   | 8.94%    | 6.67% | 1.107    |
|          | $P4mm$<br>(13.7%) | 4.0173 | 4.0173 | 4.0235 | 90       |          |       |          |

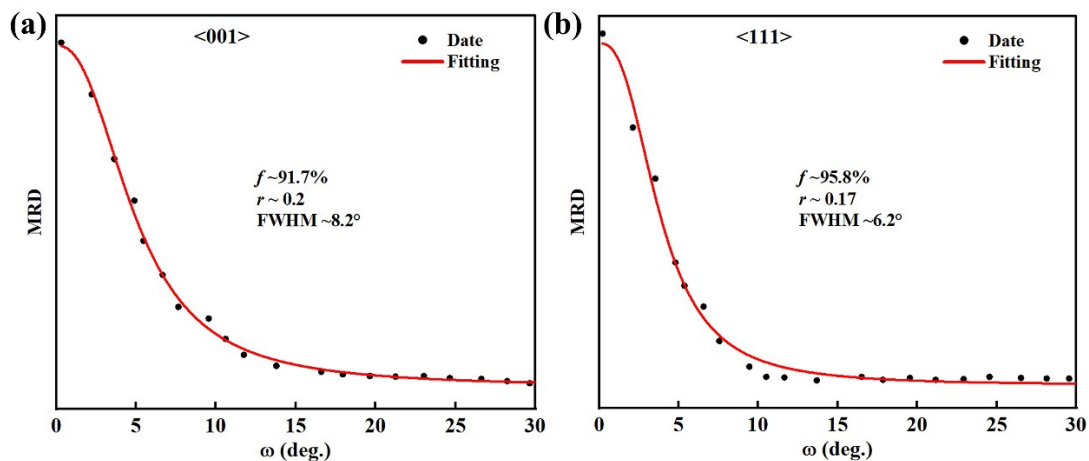**Fig. S1.** The grain orientation distributions and texture quality parameters obtained by fitting the (001) and (111) pole figures data to the March-Dollase texture model.
